# Supplementary material for: Protective Role of Mytilus edulis Hydrolysate in Lipopolysaccharide-Galactosamine Acute Liver Injury
Source: Front Pharmacol. 2021 May 18;12:667572. doi: 10.3389/fphar.2021.667572 (PMC8167060; doi:10.3389/fphar.2021.667572)
Supplement: Supplementary file 1 [file Table2.XLSX]

## Sheet: Sheet1
Scan	Sample	Peptide	Tag Length	ALC (%)	length	m/z	z	RT	Area	Mass	ppm	Accession	PTM	local confidence (%)	tag (>=0%)	mode		Amino acids	29297820000
F4:263	3	Y(+42.01)	1	61	1	224.092	1	0.85	3560000	223.084	-0.1		Acetylation (Protein N-term)	60	Y(+42.01)	HCD		Dipeptides	36488067000
F4:584	3	Y(+42.01)	1	61	1	224.092	1	1.68	3560000	223.084	0.4		Acetylation (Protein N-term)	61	Y(+42.01)	HCD		Short peptides	2635160000
F6:4101	5	Y	1	61	1	182.081	1	10.94	3860000	181.074	0.4			61	Y	HCD
F5:3398	4	Y	1	61	1	182.081	1	9.15	4300000	181.074	-0.7			61	Y	HCD
F5:4113	4	Y	1	61	1	182.081	1	10.94	4640000	181.074	0			61	Y	HCD
F5:7222	4	Y	1	61	1	182.081	1	18.79	6340000	181.074	0.9			61	Y	HCD
F5:7281	4	Y	1	60	1	182.081	1	18.93	6340000	181.074	0.4			60	Y	HCD
F5:7438	4	Y	1	61	1	182.081	1	19.31	6340000	181.074	0.4			61	Y	HCD
F6:3423	5	Y	1	61	1	182.081	1	9.24	6990000	181.074	0.1			61	Y	HCD
F4:3513	3	Y	1	61	1	182.081	1	9.46	7430000	181.074	-0.5			61	Y	HCD
F4:3721	3	Y	1	61	1	182.081	1	9.98	7430000	181.074	-0.2			61	Y	HCD
F4:5936	3	N(+42.01)	1	60	1	175.071	1	15.59	9930000	174.064	0.2		Acetylation (Protein N-term)	60	N(+42.01)	HCD
F6:4939	5	V(+42.01)	1	61	1	160.097	1	13.04	17700000	159.089	0.1		Acetylation (Protein N-term)	61	V(+42.01)	HCD
F6:7147	5	V(+42.01)	1	64	1	160.097	1	18.6	34400000	159.089	-0.5		Acetylation (Protein N-term)	65	V(+42.01)	HCD
F6:10088	5	F	1	61	1	166.086	1	25.87	153000000	165.079	0			61	F	HCD
F6:10293	5	F	1	61	1	166.086	1	26.4	153000000	165.079	0.2			61	F	HCD
F6:10509	5	F	1	61	1	166.086	1	26.92	153000000	165.079	-0.3			61	F	HCD
F6:8425	5	F	1	64	1	166.086	1	21.75	153000000	165.079	0.7			63	F	HCD
F6:8635	5	F	1	62	1	166.086	1	22.27	153000000	165.079	0.6			62	F	HCD
F6:8845	5	F	1	62	1	166.086	1	22.78	153000000	165.079	0.8			61	F	HCD
F6:9050	5	F	1	61	1	166.086	1	23.29	153000000	165.079	0.9			61	F	HCD
F6:9261	5	F	1	62	1	166.086	1	23.81	153000000	165.079	0.6			61	F	HCD
F6:9471	5	F	1	62	1	166.086	1	24.33	153000000	165.079	0.7			61	F	HCD
F6:9680	5	F	1	62	1	166.086	1	24.85	153000000	165.079	0			61	F	HCD
F6:9885	5	F	1	62	1	166.086	1	25.36	153000000	165.079	-0.2			61	F	HCD
F4:5863	3	V(+42.01)	1	62	1	160.097	1	15.4	263000000	159.089	-0.3		Acetylation (Protein N-term)	62	V(+42.01)	HCD
F4:7105	3	V(+42.01)	1	63	1	160.097	1	18.5	263000000	159.089	-0.3		Acetylation (Protein N-term)	63	V(+42.01)	HCD
F4:3436	3	K(+42.01)	1	61	1	189.123	1	9.28	315000000	188.116	-0.4		Acetylation (Protein N-term)	61	K(+42.01)	HCD
F4:3649	3	K(+42.01)	1	61	1	189.123	1	9.8	315000000	188.116	-0.4		Acetylation (Protein N-term)	61	K(+42.01)	HCD
F5:3328	4	K(+42.01)	1	61	1	189.123	1	9	406000000	188.116	-0.5		Acetylation (Protein N-term)	61	K(+42.01)	HCD
F5:3547	4	K(+42.01)	1	61	1	189.123	1	9.51	406000000	188.116	-0.7		Acetylation (Protein N-term)	61	K(+42.01)	HCD
F6:3364	5	K(+42.01)	1	62	1	189.123	1	9.11	423000000	188.116	-0.2		Acetylation (Protein N-term)	62	K(+42.01)	HCD
F6:3583	5	K(+42.01)	1	61	1	189.123	1	9.62	423000000	188.116	-0.3		Acetylation (Protein N-term)	61	K(+42.01)	HCD
F5:4797	4	Y	1	61	1	182.081	1	12.69	833000000	181.074	-0.6			61	Y	HCD
F5:5000	4	Y	1	61	1	182.081	1	13.2	833000000	181.074	0.4			61	Y	HCD
F6:4903	5	Y	1	61	1	182.081	1	12.96	872000000	181.074	0.5			61	Y	HCD
F5:4939	4	R	1	58	1	175.119	1	13.05	905000000	174.112	0.4			57	R	HCD
F5:5137	4	R	1	58	1	175.119	1	13.56	905000000	174.112	-0.1			57	R	HCD
F5:5335	4	R	1	58	1	175.119	1	14.08	905000000	174.112	0.5			57	R	HCD
F5:5539	4	R	1	58	1	175.119	1	14.59	905000000	174.112	0.3			57	R	HCD
F5:5743	4	R	1	58	1	175.119	1	15.1	905000000	174.112	0.3			57	R	HCD
F5:6151	4	R	1	58	1	175.119	1	16.14	905000000	174.112	0.5			57	R	HCD
F5:6355	4	R	1	58	1	175.119	1	16.65	905000000	174.112	0.1			57	R	HCD
F5:6769	4	R	1	58	1	175.119	1	17.68	905000000	174.112	0.1			57	R	HCD
F5:6979	4	R	1	58	1	175.119	1	18.19	905000000	174.112	0.3			57	R	HCD
F5:7399	4	R	1	58	1	175.119	1	19.22	905000000	174.112	0.3			57	R	HCD
F4:4797	3	Y	1	61	1	182.081	1	12.69	1010000000	181.074	-0.2			61	Y	HCD
F4:4999	3	Y	1	61	1	182.081	1	13.21	1010000000	181.074	0.3			61	Y	HCD
F6:4130	5	R	1	58	1	175.119	1	11.01	1230000000	174.112	0.6			57	R	HCD
F6:4333	5	R	1	58	1	175.119	1	11.52	1230000000	174.112	0			57	R	HCD
F6:4537	5	R	1	58	1	175.119	1	12.03	1230000000	174.112	0.4			57	R	HCD
F6:4741	5	R	1	58	1	175.119	1	12.54	1230000000	174.112	0.8			57	R	HCD
F6:4945	5	R	1	58	1	175.119	1	13.06	1230000000	174.112	0.5			57	R	HCD
F6:5149	5	R	1	58	1	175.119	1	13.57	1230000000	174.112	0.2			57	R	HCD
F6:5347	5	R	1	58	1	175.119	1	14.08	1230000000	174.112	0.5			57	R	HCD
F6:5551	5	R	1	59	1	175.119	1	14.6	1230000000	174.112	0.1			59	R	HCD
F6:5756	5	R	1	58	1	175.119	1	15.11	1230000000	174.112	0.1			57	R	HCD
F5:160	4	A(+42.01)K	2	61	2	260.162	1	0.57	887000	259.153	5.5		Acetylation (Protein N-term)	60 62	A(+42.01)K	HCD
F5:8006	4	YR	2	61	2	338.179	1	20.71	1140000	337.175	-9			61 61	YR	HCD
F6:8032	5	YR	2	61	2	338.179	1	20.77	1470000	337.175	-8.5			61 61	YR	HCD
F4:7875	3	FK	2	62	2	294.181	1	20.4	1780000	293.174	0.2			61 63	FK	HCD
F5:7899	4	FK	2	62	2	294.181	1	20.44	2010000	293.174	0.2			61 63	FK	HCD
F6:9275	5	M(+15.99)R	2	60	2	322.155	1	23.84	2260000	321.147	0.7		Oxidation (M)	60 60	M(+15.99)R	HCD
F4:10505	3	HK	2	53	2	284.172	1	27.05	2360000	283.164	0.4			43 63	HK	HCD
F4:10713	3	HK	2	53	2	284.172	1	27.56	2360000	283.164	0.1			43 62	HK	HCD
F6:7905	5	FK	2	60	2	294.181	1	20.46	2360000	293.174	0.6			60 61	FK	HCD
F5:7108	4	FR	2	60	2	322.188	1	18.5	3570000	321.18	1.1			61 60	FR	HCD
F4:9309	3	TK	2	62	2	248.161	1	24	5000000	247.153	0.3			60 62	TK	HCD
F4:7690	3	D(+42.01)R	2	60	2	332.158	1	19.94	5840000	331.149	4.3		Acetylation (Protein N-term)	60 60	D(+42.01)R	HCD
F6:8780	5	YK	2	61	2	310.176	1	22.62	5860000	309.169	0.3			60 61	YK	HCD
F5:7707	4	D(+42.01)R	2	60	2	332.158	1	19.97	7850000	331.149	4.8		Acetylation (Protein N-term)	60 60	D(+42.01)R	HCD
F4:7556	3	T(+42.01)R	2	61	2	318.177	1	19.61	9550000	317.17	-1		Acetylation (Protein N-term)	61 61	T(+42.01)R	HCD
F4:7765	3	T(+42.01)R	2	57	2	318.177	1	20.12	9550000	317.17	0.5		Acetylation (Protein N-term)	59 55	T(+42.01)R	HCD
F5:8439	4	DR	2	63	2	290.145	1	21.78	9920000	289.139	-2.9			70 56	DR	HCD
F5:7568	4	T(+42.01)R	2	60	2	318.177	1	19.63	11300000	317.17	0.4		Acetylation (Protein N-term)	61 60	T(+42.01)R	HCD
F5:7778	4	T(+42.01)R	2	55	2	318.178	1	20.15	11300000	317.17	0.8		Acetylation (Protein N-term)	57 51	T(+42.01)R	HCD
F6:7580	5	T(+42.01)R	2	61	2	318.177	1	19.66	11300000	317.17	0		Acetylation (Protein N-term)	61 60	T(+42.01)R	HCD
F6:7789	5	T(+42.01)R	2	60	2	318.177	1	20.18	11300000	317.17	0		Acetylation (Protein N-term)	60 60	T(+42.01)R	HCD
F4:6590	3	HR	2	52	2	312.178	1	17.24	13300000	311.171	0.5			43 61	HR	HCD
F5:8297	4	ER	2	65	2	304.161	1	21.42	13500000	303.154	-1.6			71 59	ER	HCD
F4:8824	3	DR	2	61	2	290.145	1	22.76	13800000	289.139	-2.6			69 52	DR	HCD
F5:8162	4	T(+42.01)K	2	63	2	290.171	1	21.09	14300000	289.164	0.2		Acetylation (Protein N-term)	62 63	T(+42.01)K	HCD
F6:8168	5	T(+42.01)K	2	63	2	290.171	1	21.11	16500000	289.164	-0.3		Acetylation (Protein N-term)	62 63	T(+42.01)K	HCD
F4:7139	3	MK	2	56	2	278.153	1	18.58	16900000	277.146	-0.7			46 65	MK	HCD
F4:8065	3	ER	2	62	2	304.161	1	20.87	18000000	303.154	-1.7			70 54	ER	HCD
F4:9127	3	GR	2	57	2	232.14	1	23.53	18000000	231.133	0.1			55 60	GR	HCD
F4:7131	3	T(+42.01)R	2	60	2	318.177	1	18.56	18500000	317.17	0.5		Acetylation (Protein N-term)	61 60	T(+42.01)R	HCD
F4:7340	3	T(+42.01)R	2	59	2	318.177	1	19.09	18500000	317.17	-0.3		Acetylation (Protein N-term)	60 57	T(+42.01)R	HCD
F6:7157	5	MK	2	56	2	278.153	1	18.62	19700000	277.146	-0.6			46 65	MK	HCD
F5:7150	4	MK	2	56	2	278.153	1	18.6	20200000	277.146	0			46 65	MK	HCD
F5:7358	4	MK	2	56	2	278.153	1	19.12	20200000	277.146	0.4			48 66	MK	HCD
F4:7790	3	EK	2	68	2	276.156	1	20.19	20700000	275.148	0.5			72 63	EK	HCD
F4:6505	3	MR	2	55	2	306.159	1	17.03	21200000	305.152	0.3			46 62	MR	HCD
F4:6716	3	MR	2	54	2	306.16	1	17.55	21200000	305.152	0.5			46 61	MR	HCD
F5:9157	4	GR	2	55	2	232.141	1	23.58	21300000	231.133	0.9			54 56	GR	HCD
F5:9359	4	GR	2	55	2	232.141	1	24.09	21300000	231.133	0.5			54 56	GR	HCD
F5:7149	4	T(+42.01)R	2	61	2	318.177	1	18.6	21700000	317.17	0.2		Acetylation (Protein N-term)	61 61	T(+42.01)R	HCD
F5:7359	4	T(+42.01)R	2	61	2	318.177	1	19.12	21700000	317.17	0.3		Acetylation (Protein N-term)	61 61	T(+42.01)R	HCD
F6:7161	5	T(+42.01)R	2	61	2	318.177	1	18.63	21700000	317.17	0.6		Acetylation (Protein N-term)	61 61	T(+42.01)R	HCD
F6:7370	5	T(+42.01)R	2	58	2	318.177	1	19.15	21700000	317.17	0.4		Acetylation (Protein N-term)	60 56	T(+42.01)R	HCD
F5:6956	4	HK	2	52	2	284.172	1	18.13	21800000	283.164	0.4			41 62	HK	HCD
F5:5113	4	HK	2	52	2	284.172	1	13.5	21900000	283.164	0.6			41 62	HK	HCD
F4:8150	3	HR	2	52	2	312.178	1	21.08	22200000	311.171	0			43 61	HR	HCD
F4:8356	3	HR	2	52	2	312.178	1	21.59	22200000	311.171	0.5			43 61	HR	HCD
F4:8564	3	HR	2	52	2	312.178	1	22.11	22200000	311.171	0			43 61	HR	HCD
F4:8774	3	HR	2	52	2	312.178	1	22.64	22200000	311.171	-0.4			43 61	HR	HCD
F4:8978	3	HR	2	53	2	312.178	1	23.15	22200000	311.171	-0.2			44 62	HR	HCD
F4:9182	3	HR	2	52	2	312.178	1	23.67	22200000	311.171	-0.5			43 61	HR	HCD
F4:9382	3	HR	2	53	2	312.178	1	24.18	22200000	311.171	-0.3			44 62	HR	HCD
F5:7808	4	EK	2	67	2	276.156	1	20.22	22300000	275.148	1			72 62	EK	HCD
F6:8893	5	DR	2	65	2	290.145	1	22.9	23400000	289.139	-2.3			70 59	DR	HCD
F5:8500	4	HK	2	51	2	284.172	1	21.93	23700000	283.164	0.5			41 61	HK	HCD
F5:8709	4	HK	2	50	2	284.172	1	22.45	23700000	283.164	1.1			40 59	HK	HCD
F4:5354	3	HK	2	52	2	284.172	1	14.13	25300000	283.164	0.2			41 62	HK	HCD
F6:4963	5	HK	2	52	2	284.172	1	13.1	26700000	283.164	0.5			41 62	HK	HCD
F6:5167	5	HK	2	52	2	284.172	1	13.62	26700000	283.164	0.3			41 62	HK	HCD
F4:8248	3	SR	2	61	2	262.151	1	21.33	26900000	261.144	0.5			61 61	SR	HCD
F4:8384	3	SR	2	61	2	262.151	1	21.66	26900000	261.144	0.3			61 61	SR	HCD
F4:8595	3	SR	2	61	2	262.151	1	22.19	26900000	261.144	0.4			61 61	SR	HCD
F6:8269	5	HR	2	53	2	312.178	1	21.36	31400000	311.171	-0.1			44 62	HR	HCD
F6:8479	5	HR	2	53	2	312.178	1	21.88	31400000	311.171	-0.1			44 62	HR	HCD
F6:8990	5	HR	2	53	2	312.178	1	23.14	31400000	311.171	0			44 62	HR	HCD
F6:9410	5	HR	2	53	2	312.178	1	24.17	31400000	311.171	0			44 62	HR	HCD
F4:6710	3	HK	2	52	2	284.172	1	17.53	34900000	283.164	0.5			41 62	HK	HCD
F4:6921	3	HK	2	52	2	284.172	1	18.05	34900000	283.164	-0.2			41 62	HK	HCD
F4:8476	3	HK	2	52	2	284.172	1	21.9	34900000	283.164	0.3			41 62	HK	HCD
F4:8684	3	HK	2	53	2	284.172	1	22.41	34900000	283.164	0.2			43 63	HK	HCD
F5:8013	4	MK	2	54	2	278.154	1	20.73	35100000	277.146	0.9			45 63	MK	HCD
F4:8804	3	SR	2	59	2	262.151	1	22.71	35200000	261.144	0.1			60 59	SR	HCD
F4:8985	3	SR	2	57	2	262.151	1	23.17	35200000	261.144	0.2			59 56	SR	HCD
F6:6452	5	MR	2	54	2	306.159	1	16.87	35500000	305.152	0.4			46 62	MR	HCD
F6:6655	5	MR	2	54	2	306.159	1	17.38	35500000	305.152	0.3			46 62	MR	HCD
F4:7257	3	MR	2	54	2	306.159	1	18.88	36600000	305.152	0.2			46 62	MR	HCD
F5:7496	4	HR	2	53	2	312.178	1	19.45	36600000	311.171	-0.4			44 62	HR	HCD
F5:8282	4	HR	2	53	2	312.178	1	21.38	36600000	311.171	0.4			44 62	HR	HCD
F5:8486	4	HR	2	52	2	312.178	1	21.9	36600000	311.171	0.5			43 61	HR	HCD
F5:6447	4	MR	2	54	2	306.159	1	16.88	37200000	305.152	0.3			46 62	MR	HCD
F5:6657	4	MR	2	54	2	306.159	1	17.39	37200000	305.152	0.2			46 62	MR	HCD
F4:7729	3	YK	2	64	2	310.176	1	20.03	37800000	309.169	0			63 66	YK	HCD
F4:7940	3	YK	2	62	2	310.176	1	20.56	37800000	309.169	-0.1			61 63	YK	HCD
F6:8179	5	MK	2	55	2	278.153	1	21.14	38700000	277.146	0.3			46 65	MK	HCD
F5:8799	4	SR	2	59	2	262.151	1	22.68	40100000	261.144	1.2			60 57	SR	HCD
F5:9002	4	SR	2	57	2	262.151	1	23.19	40100000	261.144	1.2			59 55	SR	HCD
F5:9208	4	SR	2	58	2	262.151	1	23.71	40100000	261.144	1.2			60 57	SR	HCD
F4:9109	3	AR	2	59	2	246.156	1	23.49	40800000	245.149	0.3			60 57	AR	HCD
F4:9142	3	AR	2	58	2	246.156	1	23.57	40800000	245.149	0			59 56	AR	HCD
F4:9512	3	AR	2	58	2	246.156	1	24.52	40800000	245.149	-0.1			60 57	AR	HCD
F5:8384	4	SR	2	62	2	262.151	1	21.64	41800000	261.144	0.5			61 61	SR	HCD
F5:8595	4	SR	2	61	2	262.151	1	22.17	41800000	261.144	1.2			61 61	SR	HCD
F4:6451	3	YR	2	62	2	338.182	1	16.89	43500000	337.175	-0.7			62 61	YR	HCD
F4:5702	3	FR	2	63	2	322.187	1	15	44500000	321.18	0.1			62 62	FR	HCD
F5:6850	4	YK	2	63	2	310.176	1	17.87	45200000	309.169	0.1			61 63	YK	HCD
F5:7057	4	YK	2	63	2	310.176	1	18.38	45200000	309.169	0.4			62 63	YK	HCD
F4:8443	3	TR	2	62	2	276.167	1	21.81	45800000	275.159	0			62 61	TR	HCD
F5:5744	4	FR	2	62	2	322.187	1	15.1	47100000	321.18	-0.1			62 62	FR	HCD
F5:9031	4	AR	2	55	2	246.156	1	23.26	47200000	245.149	0.4			57 52	AR	HCD
F5:9129	4	AR	2	58	2	246.156	1	23.51	47200000	245.149	1.3			59 57	AR	HCD
F5:9331	4	AR	2	59	2	246.156	1	24.03	47200000	245.149	1.2			60 57	AR	HCD
F5:9530	4	AR	2	59	2	246.156	1	24.54	47200000	245.149	0.3			60 57	AR	HCD
F4:7999	3	EK	2	68	2	276.156	1	20.71	47500000	275.148	0.7			72 63	EK	HCD
F6:6856	5	YK	2	63	2	310.176	1	17.87	47600000	309.169	0.3			62 65	YK	HCD
F4:7441	3	ER	2	67	2	304.162	1	19.33	47700000	303.154	0.6			72 61	ER	HCD
F4:7651	3	ER	2	67	2	304.161	1	19.84	47700000	303.154	-0.2			72 61	ER	HCD
F6:7287	5	MR	2	54	2	306.159	1	18.94	48600000	305.152	0.4			46 62	MR	HCD
F6:6182	5	HK	2	52	2	284.172	1	16.19	49800000	283.164	0.1			41 62	HK	HCD
F6:6385	5	HK	2	52	2	284.172	1	16.71	49800000	283.164	0.4			41 62	HK	HCD
F6:6591	5	HK	2	52	2	284.172	1	17.22	49800000	283.164	0.3			41 62	HK	HCD
F6:7219	5	HK	2	51	2	284.172	1	18.77	49800000	283.164	0.4			41 61	HK	HCD
F6:8498	5	HK	2	50	2	284.172	1	21.93	49800000	283.164	0.7			41 60	HK	HCD
F6:8708	5	HK	2	52	2	284.172	1	22.45	49800000	283.164	0.2			41 61	HK	HCD
F6:9128	5	HK	2	52	2	284.172	1	23.48	49800000	283.164	0.8			41 62	HK	HCD
F6:9340	5	HK	2	53	2	284.172	1	24	49800000	283.164	0.5			43 63	HK	HCD
F6:9549	5	HK	2	53	2	284.172	1	24.52	49800000	283.164	0.2			43 62	HK	HCD
F6:5743	5	FR	2	62	2	322.187	1	15.08	50400000	321.18	0.1			62 62	FR	HCD
F4:7093	3	YR	2	61	2	338.182	1	18.47	50700000	337.175	-0.6			61 61	YR	HCD
F4:8815	3	AR	2	58	2	246.156	1	22.74	51400000	245.149	0.1			59 56	AR	HCD
F4:8908	3	AR	2	55	2	246.156	1	22.98	51400000	245.149	0.4			57 52	AR	HCD
F5:7856	4	YK	2	64	2	310.176	1	20.34	51700000	309.169	0.5			62 65	YK	HCD
F5:8066	4	YK	2	62	2	310.176	1	20.86	51700000	309.169	-0.1			61 63	YK	HCD
F6:7855	5	YK	2	63	2	310.176	1	20.34	51700000	309.169	0.1			62 65	YK	HCD
F6:8059	5	YK	2	62	2	310.176	1	20.85	51700000	309.169	0			61 63	YK	HCD
F5:7263	4	MR	2	54	2	306.159	1	18.89	52200000	305.152	0.2			46 62	MR	HCD
F6:8817	5	SR	2	59	2	262.151	1	22.71	57500000	261.144	1.2			60 57	SR	HCD
F6:9025	5	SR	2	59	2	262.151	1	23.23	57500000	261.144	1.1			60 59	SR	HCD
F6:9235	5	SR	2	59	2	262.151	1	23.74	57500000	261.144	0.7			60 59	SR	HCD
F5:7447	4	ER	2	67	2	304.161	1	19.34	58500000	303.154	0.1			72 61	ER	HCD
F6:8395	5	SR	2	58	2	262.151	1	21.67	58600000	261.144	1			60 57	SR	HCD
F6:8607	5	SR	2	61	2	262.151	1	22.19	58600000	261.144	0.8			61 61	SR	HCD
F5:6481	4	YR	2	62	2	338.182	1	16.96	59600000	337.175	-0.2			62 62	YR	HCD
F6:6488	5	YR	2	63	2	338.182	1	16.96	59900000	337.175	-0.8			62 62	YR	HCD
F6:7820	5	EK	2	67	2	276.156	1	20.25	60000000	275.148	0.7			72 62	EK	HCD
F5:8407	4	TR	2	62	2	276.167	1	21.7	60200000	275.159	0.2			61 61	TR	HCD
F5:8827	4	AR	2	57	2	246.156	1	22.75	61500000	245.149	1			59 55	AR	HCD
F6:7423	5	ER	2	67	2	304.162	1	19.28	65100000	303.154	0.4			73 61	ER	HCD
F6:7633	5	ER	2	66	2	304.161	1	19.79	65100000	303.154	-0.6			72 61	ER	HCD
F4:8521	3	VK	2	62	2	246.181	1	22	68300000	245.174	0.4			61 62	VK	HCD
F4:8725	3	VK	2	62	2	246.181	1	22.52	68300000	245.174	-1.3			60 62	VK	HCD
F6:7125	5	YR	2	61	2	338.182	1	18.54	69000000	337.175	0.1			61 60	YR	HCD
F5:7111	4	YR	2	61	2	338.182	1	18.51	69900000	337.175	-0.2			61 61	YR	HCD
F6:8821	5	AR	2	57	2	246.156	1	22.72	82100000	245.149	1.3			59 55	AR	HCD
F6:9033	5	AR	2	55	2	246.156	1	23.25	82100000	245.149	1.1			57 52	AR	HCD
F6:9147	5	AR	2	58	2	246.156	1	23.53	82900000	245.149	0.4			59 56	AR	HCD
F6:9355	5	AR	2	59	2	246.156	1	24.04	82900000	245.149	0.9			60 57	AR	HCD
F6:9559	5	AR	2	59	2	246.156	1	24.55	82900000	245.149	0.4			60 57	AR	HCD
F5:8480	4	VK	2	63	2	246.181	1	21.88	83000000	245.174	0.8			62 65	VK	HCD
F5:8683	4	VK	2	62	2	246.181	1	22.39	83000000	245.174	0.5			60 62	VK	HCD
F6:7945	5	TR	2	61	2	276.166	1	20.56	93100000	275.159	-1.4			61 61	TR	HCD
F6:8239	5	TR	2	61	2	276.167	1	21.29	93100000	275.159	1.7			61 61	TR	HCD
F6:8449	5	TR	2	62	2	276.167	1	21.81	98000000	275.159	0.5			62 61	TR	HCD
F6:8654	5	TR	2	61	2	276.167	1	22.31	98000000	275.159	0.4			61 61	TR	HCD
F4:7135	3	FK	2	64	2	294.181	1	18.57	108000000	293.174	0.6			62 65	FK	HCD
F5:7159	4	FK	2	64	2	294.181	1	18.63	122000000	293.174	0.4			62 65	FK	HCD
F6:7153	5	FK	2	64	2	294.181	1	18.61	130000000	293.174	-0.1			62 65	FK	HCD
F4:6289	3	FK	2	65	2	294.181	1	16.48	145000000	293.174	0.8			63 66	FK	HCD
F6:8611	5	VK	2	62	2	246.181	1	22.21	146000000	245.174	0.4			61 63	VK	HCD
F5:6307	4	FK	2	66	2	294.181	1	16.53	152000000	293.174	0.5			65 67	FK	HCD
F6:6319	5	FK	2	65	2	294.181	1	16.54	162000000	293.174	0.8			65 67	FK	HCD
F4:8113	3	VK	2	64	2	246.181	1	20.99	164000000	245.174	0.2			63 65	VK	HCD
F6:6410	5	FR	2	62	2	322.188	1	16.77	213000000	321.18	0.9			62 62	FR	HCD
F5:6410	4	FR	2	62	2	322.188	1	16.79	221000000	321.18	0.4			62 62	FR	HCD
F4:6367	3	FR	2	63	2	322.188	1	16.69	222000000	321.18	0.9			62 62	FR	HCD
F5:8060	4	VK	2	64	2	246.181	1	20.85	224000000	245.174	0.6			63 65	VK	HCD
F5:8275	4	VK	2	63	2	246.181	1	21.37	224000000	245.174	0.7			62 65	VK	HCD
F6:7987	5	VK	2	64	2	246.181	1	20.66	258000000	245.174	0.4			63 65	VK	HCD
F6:8191	5	VK	2	64	2	246.181	1	21.17	258000000	245.174	0.3			63 65	VK	HCD
F6:8401	5	VK	2	64	2	246.181	1	21.69	258000000	245.174	0.8			62 65	VK	HCD
F4:7369	3	LK	2	68	2	260.197	1	19.15	325000000	259.19	0.3			69 67	LK	HCD
F4:7579	3	LK	2	66	2	260.197	1	19.67	325000000	259.19	0.3			67 66	LK	HCD
F4:7201	3	VR	2	63	2	274.187	1	18.74	371000000	273.18	0.1			63 62	VR	HCD
F4:7411	3	VR	2	63	2	274.187	1	19.25	371000000	273.18	-0.3			63 63	VR	HCD
F5:7381	4	LK	2	66	2	260.197	1	19.18	386000000	259.19	0.2			67 65	LK	HCD
F5:7591	4	LK	2	66	2	260.197	1	19.69	386000000	259.19	0.4			67 65	LK	HCD
F6:7393	5	LK	2	66	2	260.197	1	19.21	390000000	259.19	0.2			67 65	LK	HCD
F6:7603	5	LK	2	68	2	260.197	1	19.72	390000000	259.19	0.7			68 67	LK	HCD
F6:7201	5	VR	2	63	2	274.188	1	18.73	407000000	273.18	0.5			63 62	VR	HCD
F6:7405	5	VR	2	63	2	274.188	1	19.24	407000000	273.18	0.5			63 63	VR	HCD
F5:7153	4	VR	2	63	2	274.187	1	18.61	431000000	273.18	-0.2			63 62	VR	HCD
F5:7357	4	VR	2	59	2	274.187	1	19.12	431000000	273.18	0.2			60 57	VR	HCD
F4:7993	3	LK	2	64	2	260.197	1	20.69	447000000	259.19	0.1			65 63	LK	HCD
F4:8197	3	LK	2	65	2	260.197	1	21.2	447000000	259.19	0.4			66 65	LK	HCD
F5:8011	4	LK	2	64	2	260.197	1	20.72	566000000	259.19	0.3			65 63	LK	HCD
F5:8221	4	LK	2	65	2	260.197	1	21.24	566000000	259.19	1.4			66 65	LK	HCD
F4:7621	3	VR	2	62	2	274.187	1	19.77	567000000	273.18	-0.3			62 62	VR	HCD
F4:7831	3	VR	2	59	2	274.188	1	20.29	567000000	273.18	0.5			60 57	VR	HCD
F4:8035	3	VR	2	62	2	274.188	1	20.8	567000000	273.18	0.4			62 62	VR	HCD
F5:7777	4	VR	2	59	2	274.187	1	20.14	609000000	273.18	0			60 57	VR	HCD
F5:7987	4	VR	2	59	2	274.188	1	20.66	609000000	273.18	0.8			60 57	VR	HCD
F6:7615	5	VR	2	59	2	274.187	1	19.75	613000000	273.18	0.2			60 57	VR	HCD
F6:7825	5	VR	2	63	2	274.188	1	20.27	613000000	273.18	0.5			62 62	VR	HCD
F6:8035	5	VR	2	63	2	274.187	1	20.78	613000000	273.18	-0.3			62 62	VR	HCD
F6:8023	5	LK	2	64	2	260.197	1	20.75	622000000	259.19	0.1			65 63	LK	HCD
F6:8227	5	LK	2	64	2	260.197	1	21.26	622000000	259.19	0.8			65 63	LK	HCD
F4:6547	3	LR	2	61	2	288.203	1	17.13	728000000	287.196	0.2			63 59	LR	HCD
F4:6757	3	LR	2	61	2	288.203	1	17.65	728000000	287.196	0.2			63 57	LR	HCD
F4:6967	3	LR	2	64	2	288.203	1	18.16	975000000	287.196	0			66 62	LR	HCD
F4:7177	3	LR	2	64	2	288.203	1	18.68	975000000	287.196	0.1			66 62	LR	HCD
F4:7387	3	LR	2	65	2	288.203	1	19.2	975000000	287.196	0.3			67 62	LR	HCD
F6:6595	5	LR	2	65	2	288.203	1	17.23	979000000	287.196	-0.4			67 63	LR	HCD
F6:6805	5	LR	2	61	2	288.203	1	17.75	979000000	287.196	0.4			63 57	LR	HCD
F5:6583	4	LR	2	65	2	288.203	1	17.22	1000000000	287.196	0.3			67 63	LR	HCD
F5:6788	4	LR	2	65	2	288.203	1	17.72	1000000000	287.196	0.4			67 62	LR	HCD
F5:6997	4	LR	2	64	2	288.203	1	18.23	1130000000	287.196	-0.4			66 62	LR	HCD
F5:7207	4	LR	2	64	2	288.203	1	18.75	1130000000	287.196	0.3			66 62	LR	HCD
F5:7417	4	LR	2	61	2	288.203	1	19.26	1130000000	287.196	0.2			63 59	LR	HCD
F6:7015	5	LR	2	64	2	288.203	1	18.27	1130000000	287.196	-0.5			66 62	LR	HCD
F6:7225	5	LR	2	61	2	288.203	1	18.79	1130000000	287.196	0.3			63 59	LR	HCD
F6:7436	5	LR	2	65	2	288.203	1	19.31	1130000000	287.196	0.3			67 62	LR	HCD
F5:6491	4	EVR	3	78	3	403.23	1	16.99	636000	402.223	-0.3			85 69 79	EVR	HCD
F5:5350	4	MFR	3	70	3	453.228	1	14.11	794000	452.221	0.3			66 65 79	MFR	HCD
F6:5339	5	FLR	3	77	3	435.272	1	14.06	913000	434.264	0.4			79 73 79	FLR	HCD
F6:6274	5	YLK	3	75	3	423.261	1	16.42	921000	422.253	1.5			78 68 81	YLK	HCD
F6:6736	5	MVK	3	66	3	377.221	1	17.58	945000	376.214	-0.7			62 59 75	MVK	HCD
F5:5313	4	FLR	3	76	3	435.271	1	14.02	949000	434.264	-0.2			79 68 79	FLR	HCD
F6:5348	5	FMR	3	71	3	453.228	1	14.09	1010000	452.221	0.2			79 55 80	FMR	HCD
F4:5303	3	FMR	3	71	3	453.227	1	14	1130000	452.221	-1			79 55 79	FMR	HCD
F5:8033	4	LTR	3	77	3	389.251	1	20.77	1210000	388.243	-0.1			80 70 80	LTR	HCD
F6:8037	5	LTR	3	77	3	389.25	1	20.79	1230000	388.243	-1			81 70 80	LTR	HCD
F4:6124	3	ELR	3	80	3	417.245	1	16.07	1450000	416.238	-0.5			86 73 80	ELR	HCD
F6:5770	5	LLR	3	77	3	401.287	1	15.15	1460000	400.28	-0.7			82 69 80	LLR	HCD
F5:5817	4	YLK	3	78	3	423.26	1	15.29	1490000	422.253	0			79 74 82	YLK	HCD
F4:5842	3	MLK	3	73	3	391.237	1	15.35	1590000	390.23	0			66 72 82	MLK	HCD
F5:6111	4	ELR	3	80	3	417.245	1	16.03	2120000	416.238	-0.6			86 73 79	ELR	HCD
F4:5452	3	YLR	3	77	3	451.266	1	14.37	2130000	450.259	-0.2			79 73 79	YLR	HCD
F4:7870	3	A(+42.01)PR	3	72	3	385.221	1	20.38	2410000	384.212	5.5		Acetylation (Protein N-term)	77 62 79	A(+42.01)PR	HCD
F4:7721	3	LPR	3	75	3	385.256	1	20.01	2500000	384.248	0.3			81 63 80	LPR	HCD
F6:5732	5	T(+42.01)LR	3	73	3	431.261	1	15.05	2560000	430.254	0.1		Acetylation (Protein N-term)	77 63 79	T(+42.01)LR	HCD
F4:5456	3	FVK	3	77	3	393.25	1	14.39	2590000	392.242	0.2			79 70 82	FVK	HCD
F4:6326	3	ELR	3	78	3	417.246	1	16.58	2930000	416.238	0.1			85 71 79	ELR	HCD
F6:8649	5	TPR	3	71	3	373.219	1	22.3	3160000	372.212	0			78 57 79	TPR	HCD
F6:5471	5	YLR	3	77	3	451.266	1	14.4	3190000	450.259	0.2			79 73 80	YLR	HCD
F4:6494	3	T(+42.01)LK	3	76	3	403.255	1	17	3200000	402.248	-0.7		Acetylation (Protein N-term)	77 72 81	T(+42.01)LK	HCD
F5:8092	4	A(+42.01)PR	3	70	3	385.221	1	20.92	3430000	384.212	3.5		Acetylation (Protein N-term)	77 56 79	A(+42.01)PR	HCD
F6:8393	5	HLR	3	72	3	425.262	1	21.67	3440000	424.255	0.4			62 73 79	HLR	HCD
F6:8603	5	HLR	3	66	3	425.262	1	22.18	3440000	424.255	-0.4			61 66 72	HLR	HCD
F6:7712	5	LPR	3	75	3	385.256	1	19.98	3590000	384.248	0.1			81 65 80	LPR	HCD
F5:5474	4	FVK	3	78	3	393.25	1	14.43	3620000	392.242	0.3			79 71 83	FVK	HCD
F5:7719	4	LPR	3	75	3	385.255	1	20	3710000	384.248	-0.7			81 65 80	LPR	HCD
F6:6497	5	T(+42.01)LK	3	77	3	403.255	1	16.99	3920000	402.248	-1.1		Acetylation (Protein N-term)	78 72 81	T(+42.01)LK	HCD
F6:8104	5	A(+42.01)PR	3	71	3	385.221	1	20.95	4080000	384.212	4.2		Acetylation (Protein N-term)	77 56 79	A(+42.01)PR	HCD
F6:6154	5	MLK	3	73	3	391.237	1	16.12	4160000	390.23	-1.4			65 72 80	MLK	HCD
F5:6699	4	VER	3	75	3	403.23	1	17.51	4400000	402.223	-0.4			77 73 77	VER	HCD
F5:6275	4	T(+42.01)LK	3	77	3	403.255	1	16.44	4430000	402.248	-0.6		Acetylation (Protein N-term)	77 72 82	T(+42.01)LK	HCD
F5:6493	4	T(+42.01)LK	3	77	3	403.255	1	16.99	4430000	402.248	0.2		Acetylation (Protein N-term)	77 72 81	T(+42.01)LK	HCD
F6:6302	5	ELR	3	79	3	417.245	1	16.5	4540000	416.238	-1.2			85 72 79	ELR	HCD
F6:6680	5	ELK	3	78	3	389.239	1	17.44	4540000	388.232	-0.2			85 67 81	ELK	HCD
F5:6315	4	ELR	3	79	3	417.245	1	16.55	4680000	416.238	-0.8			85 72 79	ELR	HCD
F4:5355	3	FLK	3	78	3	407.265	1	14.13	4980000	406.258	-0.3			79 74 82	FLK	HCD
F4:6377	3	TLR	3	75	3	389.251	1	16.71	5540000	388.243	0.5			78 67 80	TLR	HCD
F4:6583	3	LTR	3	75	3	389.25	1	17.22	5540000	388.243	-0.4			81 65 80	LTR	HCD
F6:5957	5	FVK	3	74	3	393.25	1	15.62	6100000	392.242	0			78 65 80	FVK	HCD
F5:5950	4	FVK	3	74	3	393.25	1	15.62	6190000	392.242	-0.4			78 65 80	FVK	HCD
F4:8057	3	VPR	3	71	3	371.24	1	20.84	6510000	370.233	1			78 57 79	VPR	HCD
F4:8259	3	VPR	3	72	3	371.24	1	21.35	6510000	370.233	0.1			79 57 80	VPR	HCD
F4:8471	3	VPR	3	72	3	371.24	1	21.88	6510000	370.233	-0.5			79 59 80	VPR	HCD
F4:7406	3	SLK	3	76	3	347.229	1	19.24	6820000	346.222	0.1			79 68 82	SLK	HCD
F4:7615	3	TVK	3	77	3	347.229	1	19.75	6820000	346.222	0.7			79 70 82	TVK	HCD
F5:8039	4	VPR	3	71	3	371.241	1	20.79	6920000	370.233	1.7			77 56 79	VPR	HCD
F5:8252	4	VPR	3	72	3	371.24	1	21.31	6920000	370.233	0.1			78 59 80	VPR	HCD
F5:8464	4	VPR	3	72	3	371.24	1	21.84	6920000	370.233	0			79 59 80	VPR	HCD
F5:5171	4	FLK	3	78	3	407.265	1	13.65	7260000	406.258	-0.2			79 73 82	FLK	HCD
F5:5372	4	FLK	3	78	3	407.265	1	14.17	7260000	406.258	-0.4			79 74 82	FLK	HCD
F6:6626	5	TLR	3	75	3	389.251	1	17.31	8010000	388.243	0			79 68 80	TLR	HCD
F6:5176	5	FLK	3	77	3	407.265	1	13.64	8510000	406.258	-0.4			78 72 82	FLK	HCD
F6:5377	5	LFK	3	78	3	407.265	1	14.16	8510000	406.258	-0.5			82 71 82	LFK	HCD
F6:7347	5	SLK	3	77	3	347.229	1	19.09	9460000	346.222	0.9			78 72 82	SLK	HCD
F6:7556	5	TVK	3	77	3	347.229	1	19.6	9460000	346.222	0.1			78 70 82	TVK	HCD
F6:7768	5	TVK	3	76	3	347.229	1	20.12	9460000	346.222	0.1			78 70 82	TVK	HCD
F5:6559	4	LTR	3	75	3	389.251	1	17.16	9540000	388.243	-0.3			81 65 80	LTR	HCD
F5:6763	4	LTR	3	75	3	389.25	1	17.66	9540000	388.243	-0.3			79 67 79	LTR	HCD
F4:5570	3	VLR	3	77	3	387.271	1	14.67	10300000	386.264	0			79 73 80	VLR	HCD
F5:7531	4	SLK	3	76	3	347.229	1	19.54	10400000	346.222	-0.1			78 68 82	SLK	HCD
F5:7742	4	VTK	3	76	3	347.229	1	20.06	10400000	346.222	0.4			78 70 82	VTK	HCD
F5:5481	4	MLR	3	73	3	419.243	1	14.45	10900000	418.236	-0.1			66 73 80	MLR	HCD
F4:5455	3	MLR	3	73	3	419.243	1	14.38	11600000	418.236	-0.2			66 73 80	MLR	HCD
F6:5498	5	MLR	3	73	3	419.243	1	14.47	11700000	418.236	-1.1			66 73 80	MLR	HCD
F4:6777	3	VVK	3	77	3	345.25	1	17.7	12400000	344.242	0.2			78 70 82	VVK	HCD
F4:6986	3	VVK	3	78	3	345.25	1	18.21	12400000	344.242	0			79 71 82	VVK	HCD
F4:7199	3	VVK	3	76	3	345.25	1	18.73	12400000	344.242	0.3			78 70 82	VVK	HCD
F4:4745	3	FLR	3	76	3	435.272	1	12.57	12800000	434.264	0.3			79 69 80	FLR	HCD
F4:4946	3	LFR	3	78	3	435.271	1	13.07	12800000	434.264	0			82 71 81	LFR	HCD
F6:8050	5	VPR	3	72	3	371.24	1	20.82	12900000	370.233	-0.4			78 57 79	VPR	HCD
F6:8257	5	VPR	3	72	3	371.24	1	21.33	12900000	370.233	0.2			79 59 80	VPR	HCD
F6:8467	5	VPR	3	73	3	371.24	1	21.85	12900000	370.233	0.2			79 60 81	VPR	HCD
F6:5367	5	VLR	3	77	3	387.271	1	14.13	13100000	386.264	-0.8			79 73 80	VLR	HCD
F6:5570	5	VLR	3	77	3	387.271	1	14.65	13100000	386.264	-0.6			79 73 80	VLR	HCD
F4:6907	3	TVR	3	74	3	375.235	1	18.02	15400000	374.228	0			79 65 80	TVR	HCD
F4:7117	3	LSR	3	74	3	375.235	1	18.53	15400000	374.228	-1.2			80 63 80	LSR	HCD
F5:5521	4	VLR	3	77	3	387.272	1	14.55	15700000	386.264	0.2			79 73 80	VLR	HCD
F4:6200	3	VVR	3	74	3	373.255	1	16.26	15900000	372.248	-0.7			78 65 79	VVR	HCD
F4:6406	3	VVR	3	74	3	373.256	1	16.78	15900000	372.248	-0.4			78 63 79	VVR	HCD
F4:6891	3	LTK	3	77	3	361.245	1	17.98	15900000	360.237	0.7			79 69 82	LTK	HCD
F4:7100	3	TLK	3	79	3	361.244	1	18.49	15900000	360.237	-0.3			79 74 83	TLK	HCD
F6:6992	5	VVK	3	78	3	345.25	1	18.21	16600000	344.242	0.4			79 71 83	VVK	HCD
F6:7204	5	VVK	3	77	3	345.25	1	18.73	16600000	344.242	0.6			79 70 82	VVK	HCD
F5:4715	4	FLR	3	76	3	435.272	1	12.48	17300000	434.264	0.2			79 69 80	FLR	HCD
F5:4915	4	LFR	3	77	3	435.272	1	12.99	17300000	434.264	0.1			81 71 80	LFR	HCD
F5:5114	4	LFR	3	77	3	435.272	1	13.5	17300000	434.264	0.5			82 70 79	LFR	HCD
F5:6766	4	VVK	3	77	3	345.25	1	17.67	17500000	344.242	1.1			78 70 82	VVK	HCD
F5:6980	4	VVK	3	77	3	345.25	1	18.19	17500000	344.242	0			79 71 82	VVK	HCD
F5:7190	4	VVK	3	77	3	345.25	1	18.71	17500000	344.242	0.6			79 70 82	VVK	HCD
F6:7129	5	TLK	3	79	3	361.245	1	18.55	17800000	360.237	0.1			79 74 83	TLK	HCD
F4:5773	3	LVR	3	76	3	387.271	1	15.18	17900000	386.264	-0.3			82 66 81	LVR	HCD
F5:7112	4	TLK	3	79	3	361.245	1	18.51	18200000	360.237	0.3			79 74 83	TLK	HCD
F5:7322	4	TLK	3	74	3	361.244	1	19.03	18200000	360.237	-0.3			77 66 81	TLK	HCD
F4:5020	3	VFR	3	76	3	421.255	1	13.27	18300000	420.248	-0.5			79 70 81	VFR	HCD
F4:5215	3	FVR	3	75	3	421.255	1	13.77	18300000	420.248	-0.5			79 66 79	FVR	HCD
F6:6895	5	SLR	3	76	3	375.235	1	17.97	20400000	374.228	-0.1			79 68 80	SLR	HCD
F6:7099	5	TVR	3	75	3	375.235	1	18.48	20400000	374.228	-0.6			79 66 80	TVR	HCD
F6:4750	5	LFR	3	78	3	435.272	1	12.56	21900000	434.264	0.5			82 71 81	LFR	HCD
F6:4951	5	LFR	3	77	3	435.272	1	13.07	21900000	434.264	0.3			81 71 80	LFR	HCD
F6:6225	5	VVR	3	74	3	373.255	1	16.3	22000000	372.248	-0.7			78 65 79	VVR	HCD
F6:6431	5	VVR	3	74	3	373.256	1	16.82	22000000	372.248	-0.3			78 65 79	VVR	HCD
F6:6685	5	VVR	3	76	3	373.256	1	17.46	22000000	372.248	-0.5			79 70 79	VVR	HCD
F5:5233	4	FVR	3	74	3	421.256	1	13.81	22400000	420.248	-0.5			79 66 79	FVR	HCD
F5:5320	4	FVR	3	68	3	421.255	1	14.04	22400000	420.248	-1			74 55 74	FVR	HCD
F5:6223	4	VVR	3	74	3	373.256	1	16.32	23600000	372.248	-0.2			78 65 79	VVR	HCD
F5:6429	4	VVR	3	74	3	373.255	1	16.84	23600000	372.248	-0.7			78 65 79	VVR	HCD
F5:6671	4	VVR	3	76	3	373.255	1	17.43	23600000	372.248	-1.2			79 70 79	VVR	HCD
F6:5033	5	VFR	3	75	3	421.256	1	13.28	23700000	420.248	0.6			79 66 80	VFR	HCD
F6:5233	5	FVR	3	75	3	421.256	1	13.79	23700000	420.248	0.5			79 66 80	FVR	HCD
F6:5324	5	FVR	3	68	3	421.255	1	14.03	23700000	420.248	-0.8			73 60 71	FVR	HCD
F5:6883	4	TVR	3	74	3	375.235	1	17.95	24300000	374.228	0			78 65 80	TVR	HCD
F5:7093	4	TVR	3	73	3	375.235	1	18.47	24300000	374.228	-0.4			78 62 80	TVR	HCD
F5:7304	4	VTR	3	75	3	375.235	1	18.99	24300000	374.228	0			78 69 79	VTR	HCD
F5:5725	4	LVR	3	77	3	387.271	1	15.06	26500000	386.264	-0.7			81 71 80	LVR	HCD
F5:5930	4	VLR	3	76	3	387.271	1	15.57	26500000	386.264	-0.3			79 68 80	VLR	HCD
F5:6133	4	VLR	3	78	3	387.271	1	16.09	26500000	386.264	-0.3			79 74 80	VLR	HCD
F6:5781	5	LVR	3	76	3	387.271	1	15.17	27000000	386.264	-0.2			82 67 81	LVR	HCD
F6:6188	5	VLR	3	78	3	387.272	1	16.21	27000000	386.264	0.1			79 74 80	VLR	HCD
F4:5765	3	LLK	3	79	3	373.281	1	15.16	30600000	372.274	-0.3			81 74 82	LLK	HCD
F4:5965	3	LLK	3	79	3	373.281	1	15.66	30600000	372.274	-0.1			81 74 82	LLK	HCD
F4:6136	3	VLK	3	78	3	359.265	1	16.1	36300000	358.258	-1.1			78 73 82	VLK	HCD
F4:6337	3	VLK	3	79	3	359.265	1	16.61	36300000	358.258	-0.1			79 74 83	VLK	HCD
F4:6541	3	LVK	3	76	3	359.265	1	17.12	36300000	358.258	-0.3			81 66 82	LVK	HCD
F4:6753	3	VLK	3	77	3	359.265	1	17.64	36300000	358.258	0			78 72 81	VLK	HCD
F6:5965	5	LLK	3	80	3	373.281	1	15.64	43000000	372.274	0.2			82 75 83	LLK	HCD
F6:6169	5	LLK	3	78	3	373.281	1	16.16	43000000	372.274	-0.2			80 72 81	LLK	HCD
F5:5941	4	LLK	3	80	3	373.281	1	15.6	43400000	372.274	0			82 75 83	LLK	HCD
F5:6145	4	LLK	3	77	3	373.281	1	16.12	43400000	372.274	0.4			80 72 81	LLK	HCD
F6:6361	5	VLK	3	78	3	359.265	1	16.65	49500000	358.258	-0.6			79 73 82	VLK	HCD
F6:6565	5	LVK	3	76	3	359.265	1	17.16	49500000	358.258	-0.3			81 66 82	LVK	HCD
F6:6775	5	VLK	3	77	3	359.265	1	17.68	49500000	358.258	-0.5			78 73 81	VLK	HCD
F4:4955	3	LLR	3	78	3	401.287	1	13.1	50600000	400.28	-0.6			81 73 80	LLR	HCD
F4:5155	3	LLR	3	79	3	401.287	1	13.62	50600000	400.28	-0.2			82 74 81	LLR	HCD
F4:5353	3	LLR	3	79	3	401.287	1	14.13	50600000	400.28	0			82 74 80	LLR	HCD
F5:6331	4	VLK	3	78	3	359.265	1	16.59	52000000	358.258	0.1			79 74 83	VLK	HCD
F5:6535	4	VLK	3	76	3	359.265	1	17.1	52000000	358.258	-0.1			79 68 82	VLK	HCD
F5:6739	4	VLK	3	78	3	359.265	1	17.61	52000000	358.258	0.3			79 73 82	VLK	HCD
F5:5131	4	LLR	3	77	3	401.287	1	13.55	63500000	400.28	0.1			82 69 80	LLR	HCD
F5:5329	4	LLR	3	79	3	401.287	1	14.06	63500000	400.28	0.2			82 74 81	LLR	HCD
F5:5533	4	LLR	3	77	3	401.287	1	14.58	63500000	400.28	-0.2			82 69 81	LLR	HCD
F6:5143	5	LLR	3	79	3	401.287	1	13.56	71700000	400.28	0.3			82 74 81	LLR	HCD
F6:5341	5	LLR	3	79	3	401.287	1	14.07	71700000	400.28	0.2			82 74 81	LLR	HCD
F6:5545	5	LLR	3	77	3	401.287	1	14.59	71700000	400.28	-0.3			82 70 81	LLR	HCD
F5:206	4	FDNK	4	72	4	523.255	1	0.7	323000	522.244	7.9			93 92 61 41	FDNK	HCD
F5:7481	4	AM(+15.99)CK	4	69	4	468.195	1	19.42	561000	467.187	0.2		Oxidation (M)	52 45 95 84	AM(+15.99)CK	HCD
F6:6394	5	MCTR	4	62	4	510.216	1	16.73	642000	509.209	0.1			32 35 80 99	MCTR	HCD
F5:6388	4	MCTR	4	55	4	510.216	1	16.74	647000	509.209	0.3			27 28 69 98	MCTR	HCD
F4:296	3	LDNK	4	67	4	489.271	1	0.95	677000	488.26	7.9			88 87 55 40	LDNK	HCD
F4:7023	3	MTCK	4	72	4	482.21	1	18.3	714000	481.203	-0.1			56 54 95 82	MTCK	HCD
F6:280	5	LDNK	4	64	4	489.271	1	0.9	754000	488.26	7.7			84 84 50 39	LDNK	HCD
F6:6791	5	AM(+15.99)CR	4	65	4	496.201	1	17.72	761000	495.193	0		Oxidation (M)	49 39 93 81	AM(+15.99)CR	HCD
F4:6793	3	AM(+15.99)CR	4	66	4	496.201	1	17.74	806000	495.193	-0.2		Oxidation (M)	50 39 93 81	AM(+15.99)CR	HCD
F6:7013	5	MTCK	4	69	4	482.21	1	18.26	895000	481.203	-0.2			51 49 93 82	MTCK	HCD
F5:7010	4	MTCK	4	70	4	482.21	1	18.27	962000	481.203	0			66 43 91 81	MTCK	HCD
F5:8210	4	SMCR	4	54	4	496.2	1	21.21	978000	495.193	-0.8			92 28 61 37	SMCR	HCD
F6:6651	5	SSYK	4	70	4	484.24	1	17.37	1050000	483.233	-0.3			82 71 83 41	SSYK	HCD
F5:6647	4	SSYK	4	68	4	484.24	1	17.37	1120000	483.233	0			81 69 82 40	SSYK	HCD
F6:8192	5	SMCR	4	67	4	496.2	1	21.17	1430000	495.193	-0.3			94 32 66 78	SMCR	HCD
F6:6035	5	LTVR	4	98	4	488.319	1	15.82	1630000	487.312	0.2			99 97 100 100	LTVR	HCD
F5:6035	4	LTVR	4	99	4	488.319	1	15.84	1670000	487.312	0.4			100 99 100 100	LTVR	HCD
F6:303	5	A(+42.01)GPK	4	52	4	414.236	1	0.96	2240000	413.227	3.8		Acetylation (Protein N-term)	93 31 48 38	A(+42.01)GPK	HCD
F4:5169	3	LDGK	4	78	4	432.245	1	13.65	3300000	431.238	-0.2			98 82 85 48	LDGK	HCD
F6:3406	5	A(+42.01)SGR	4	54	4	432.224	1	9.2	3470000	431.213	9.1		Acetylation (Protein N-term)	71 33 55 56	A(+42.01)SGR	HCD
F5:7095	4	VPLM(+15.99)K	5	58	5	603.359	1	18.47	604000	602.346	8.7		Oxidation (M)	44 44 45 66 90	VPLM(+15.99)K	HCD
F6:7071	5	VPLM(+15.99)K	5	69	5	603.359	1	18.41	746000	602.346	8.9		Oxidation (M)	48 54 61 83 99	VPLM(+15.99)K	HCD
F5:7444	4	APLER	5	64	5	585.333	1	19.33	802000	584.328	-4.2			29 37 69 95 90	APLER	HCD
F6:7421	5	APLER	5	64	5	585.333	1	19.27	1050000	584.328	-4.2			30 38 70 96 90	APLER	HCD
F6:309	5	QPSHCK	6	50	6	699.327	1	0.97	910000	698.317	4.4			27 21 39 81 75 55	QPSHCK	HCD
										344.242
										389.237
										698.317
